# Supplementary material for: Does the Caesarean Section Impact on 11β HSD2 and Fetal Cortisol?
Source: MDPI journal article supplement (doi:10.3390/ijerph17155566), 2020-08-01
Supplement: s1 [file s1]

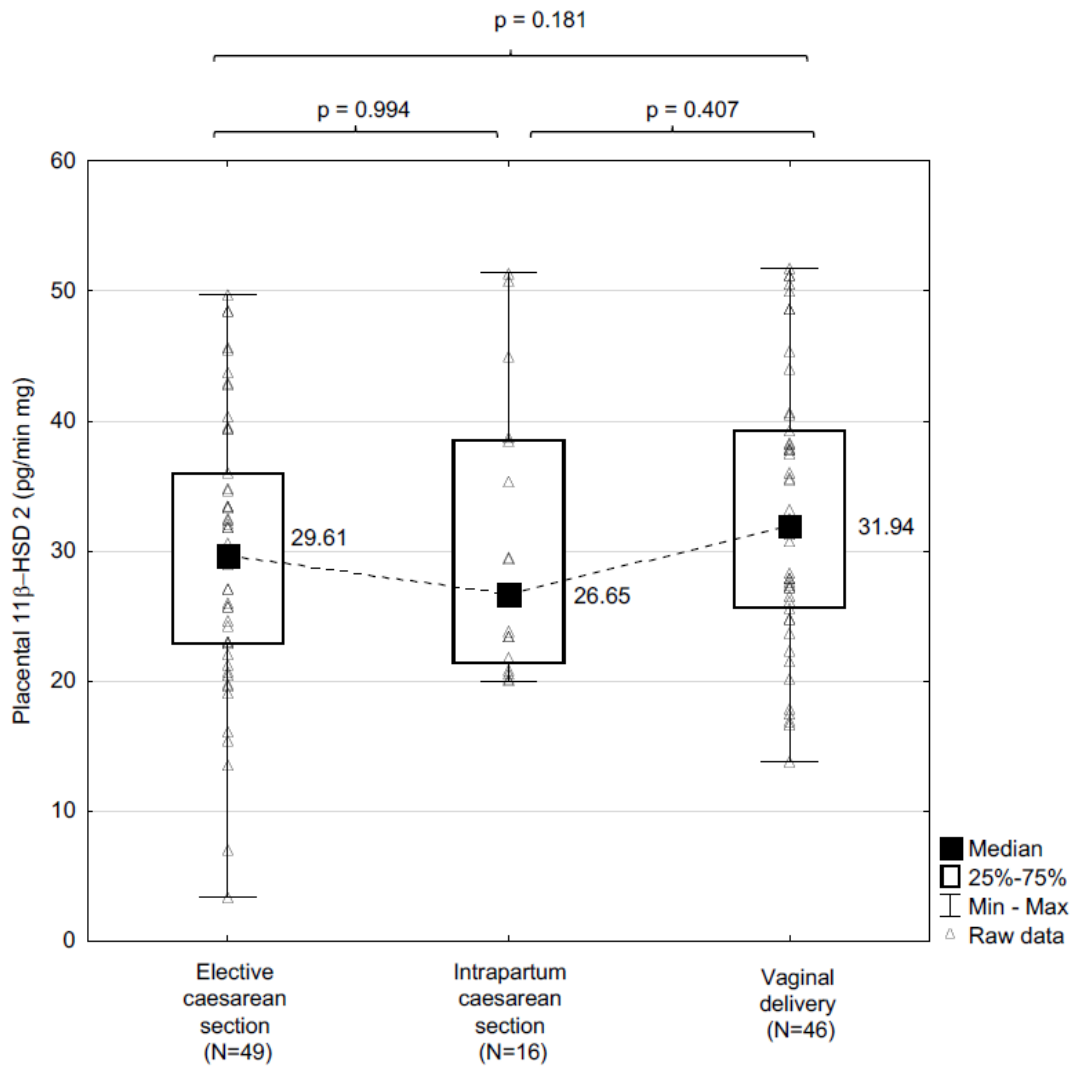

Figure S1. Placental 11β-HSD 2 in three modes of delivery. Notes:  $p$  for Mann-Whitney's test. The numerical values next to the boxes represent median.

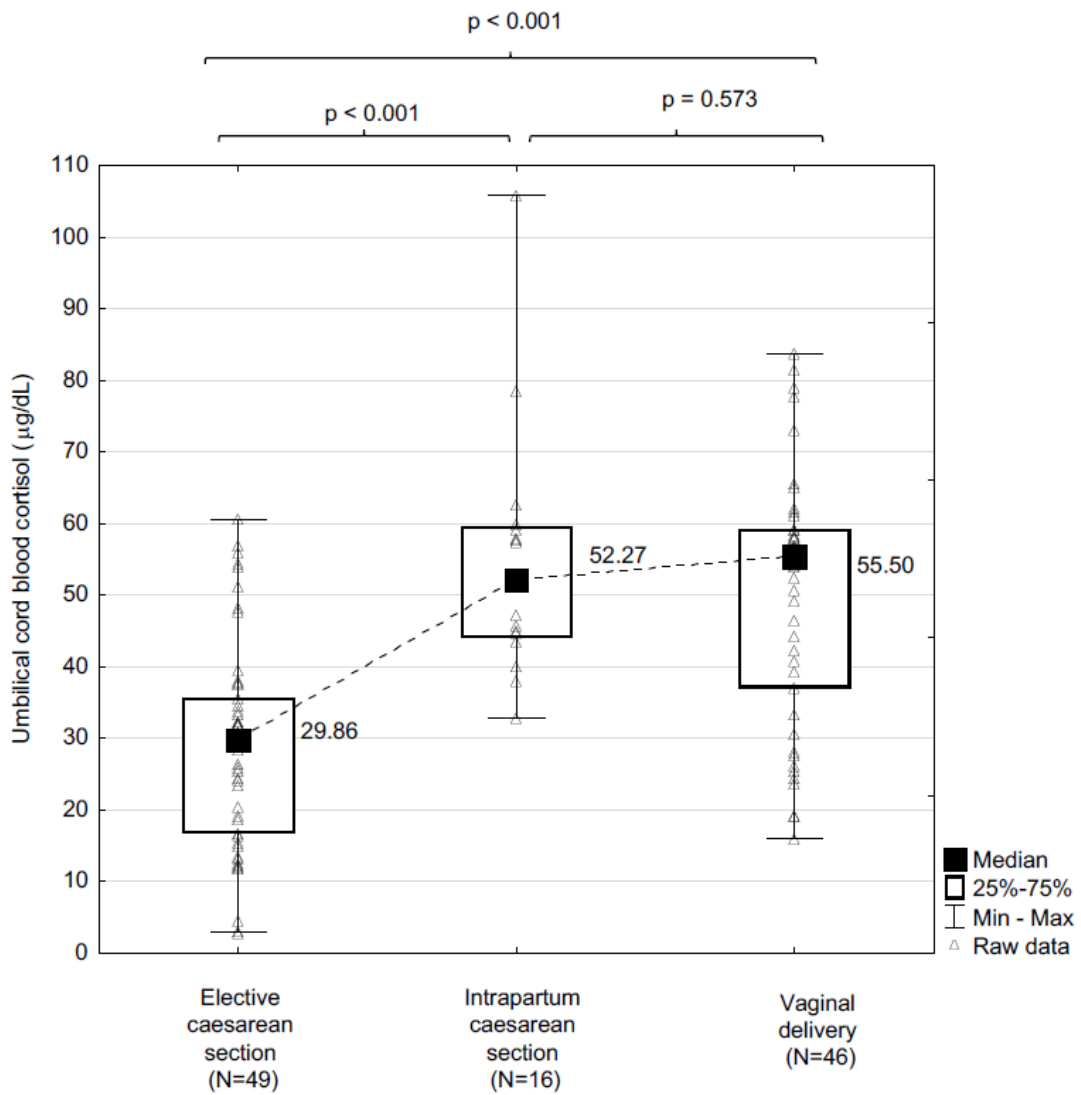

Figure S2. Umbilical cord blood cortisol in three modes of delivery. Notes:  $p$  for Mann-Whitney's test. The numerical values next to the boxes represent median.

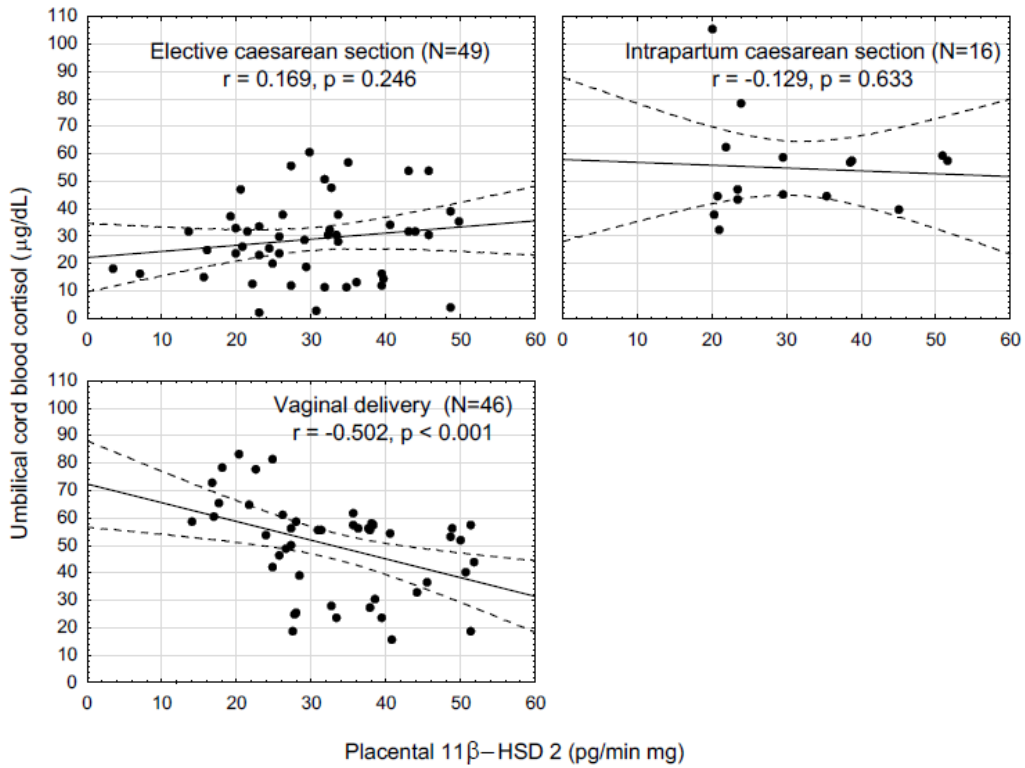

Figure S3. Correlation between placental 11β-HSD 2 and umbilical cord blood cortisol in three modes of delivery. Notes:  $r$ —Spearman’s correlation coefficient.

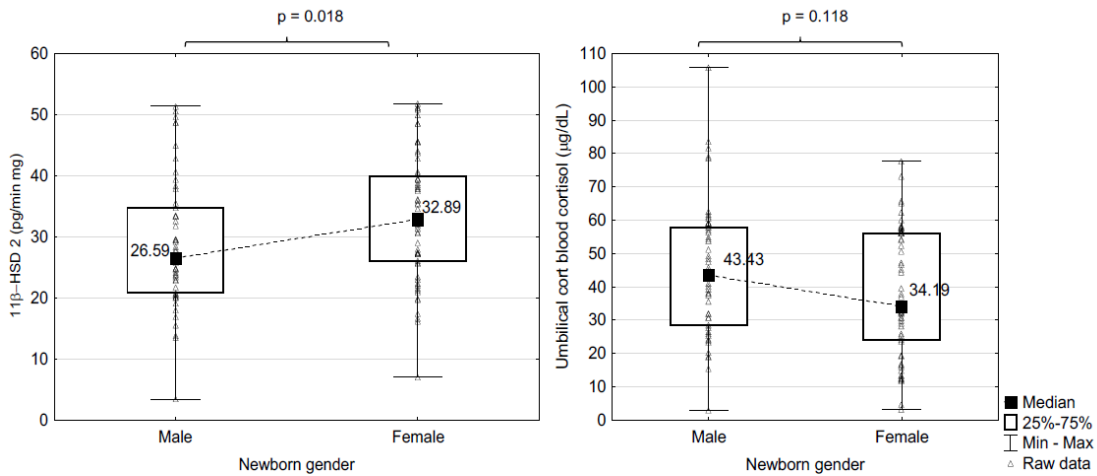

Figure S4. Placental 11β-HSD2 and umbilical cord blood cortisol versus newborn gender. Notes:  $p$  for Mann-Whitney’s test. The numerical values next to the boxes represent median.
